# Supplementary material for: Covalent flexible peptide docking in Rosetta
Source: PubMed Central journal article supplement — Chem Sci. 2021 Jul 12;12(32):10836–47. doi: 10.1039/d1sc02322e (PMC8372624; doi:10.1039/d1sc02322e), 2021-07-12
Supplement: SC-012-D1SC02322E-s001.pdf [file SC-012-D1SC02322E-s001.pdf]

## Supplementary Information

### Covalent Flexible Peptide Docking in Rosetta

Barr Tivon<sup>1,\*</sup>, Ronen Gabizon<sup>1,\*</sup>, Bente A. Somsen<sup>2</sup>, Peter J. Cossar<sup>2</sup>, Christian Ottmann<sup>2</sup>, Nir London<sup>1,#</sup>

<sup>1</sup> Department of Chemical and Structural Biology, The Weizmann Institute of Science, Rehovot, 7610001, Israel

<sup>2</sup> Laboratory of Chemical Biology, Department of Biomedical Engineering and Institute for Complex Molecular Systems, Eindhoven University of Technology, P.O. Box 513, 5600MB Eindhoven, The Netherlands

Keywords: Covalent peptides; peptide docking; FlexPepDock; 14-3-3; Electrophilic peptides; CovPepDock

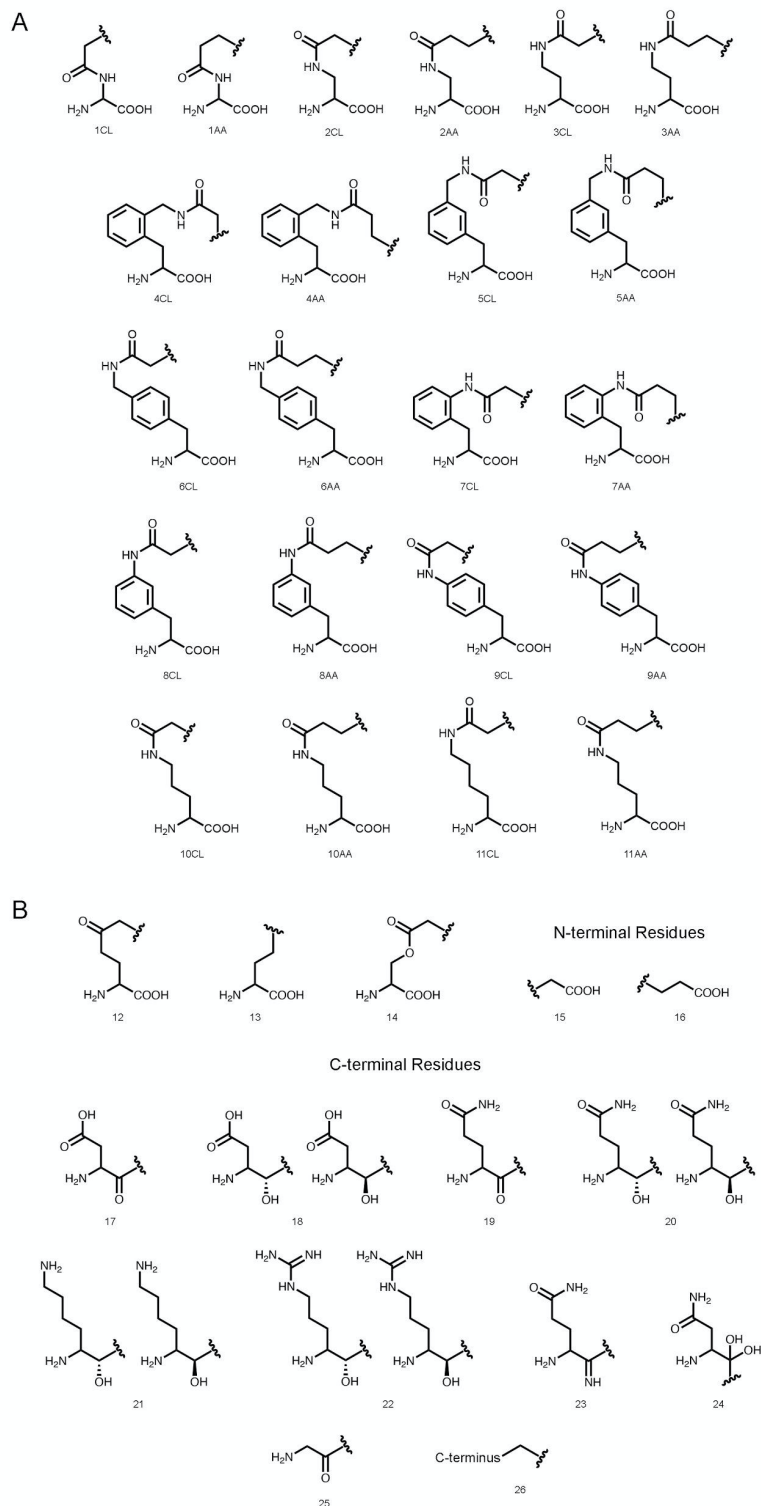

**Supplementary Figure 1: Electrophilic residues parametrized for use in covalent docking, shown in their adduct form. A.** 22 acrylamide- (AA) and chloroacetamide-based (CL) amino acids implemented for use in our design protocol. **B.** Additional 15 electrophilic residues that were implemented to model complexes from the electrophiles dataset.

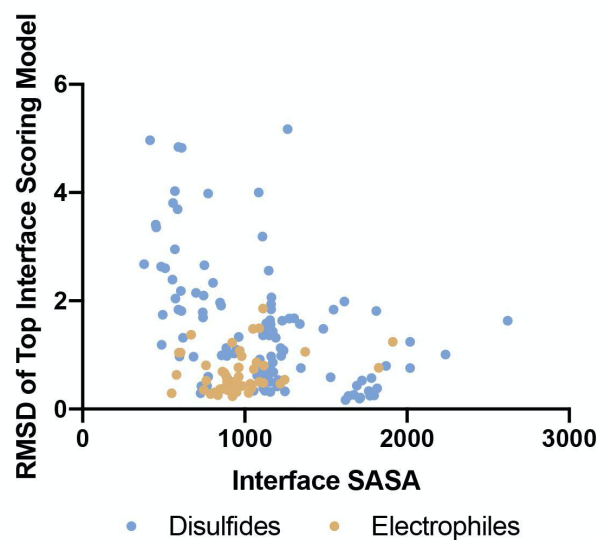

**Supplementary Figure 2: Accuracy as a function of the interface surface area.** The results show a sharp decrease in success rate for complexes with very small interfaces. For example, over the disulfides dataset, the top-scoring model is near-native in only 30% of the structures with SASA < 700, as opposed to 90% of the cases with SASA > 700. Such small interfaces are less common in the electrophiles dataset than in the disulfides dataset (9% and 20%, respectively).

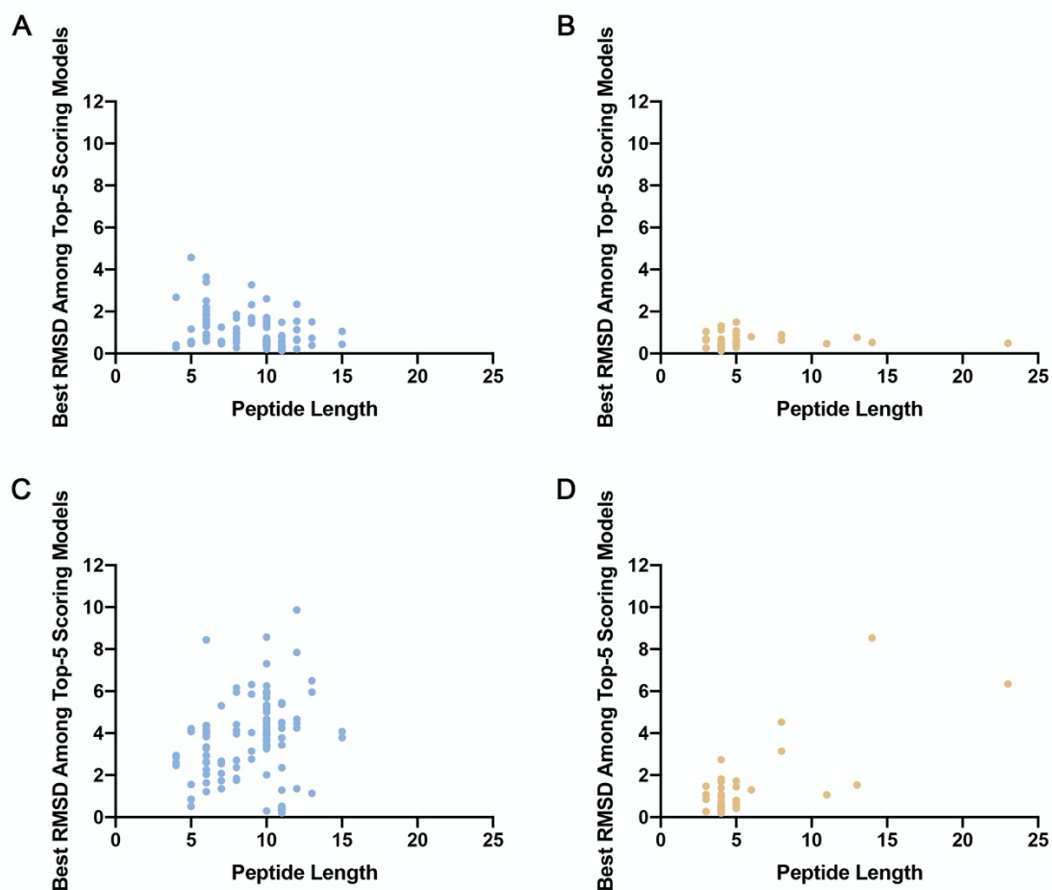

**Supplementary Figure 3: Accuracy as a function of the peptide length.** The best RMSD among the top-5 scoring model when docking from the native peptide conformation for **A.** the disulfide set and **B.** the electrophile set. Performance for docking from an extended peptide conformation for **C.** the disulfide set and **D.** the electrophile set.

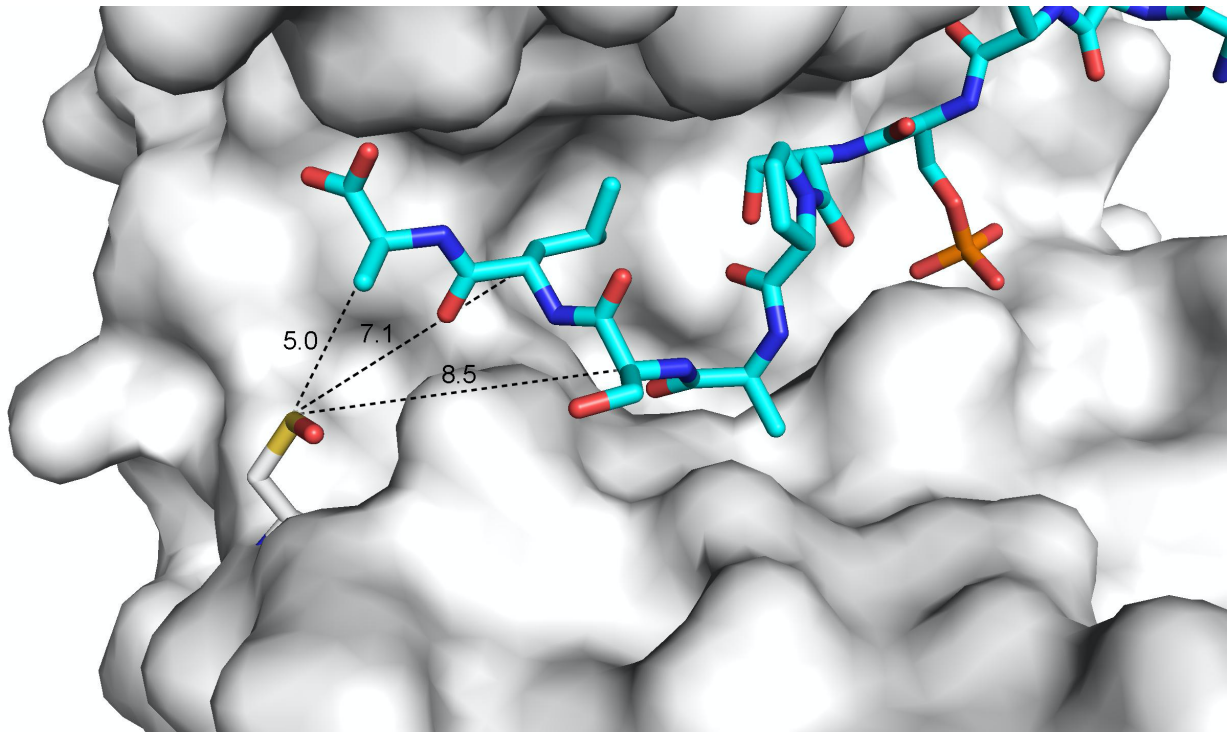

**Supplementary Figure 4: 14-3-3 $\sigma$  non-covalent complex with YAP1 phosphopeptide.** The three C-terminal positions (131-133) were identified as potential sites for electrophile installation. The C $\alpha$ -S $\gamma$  distance is shown in the figure.

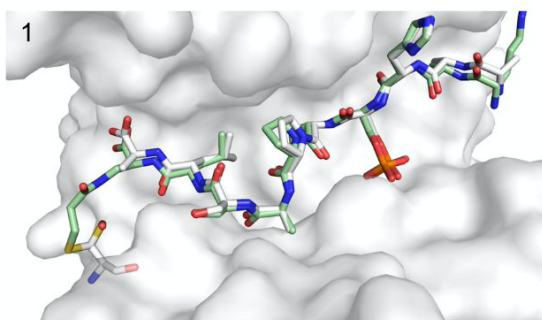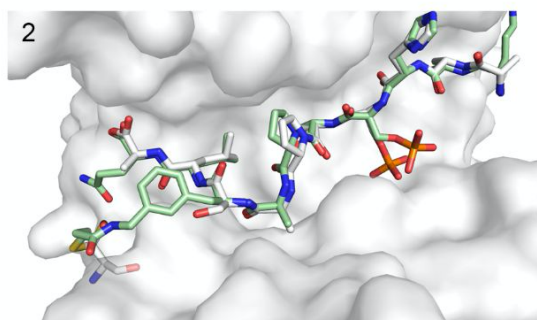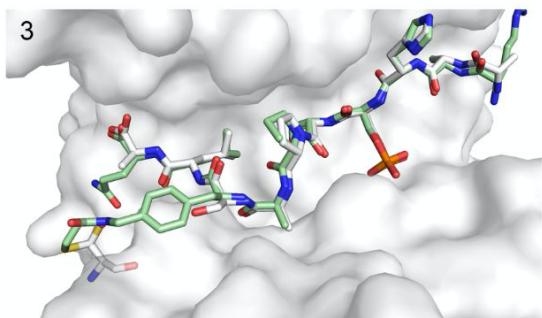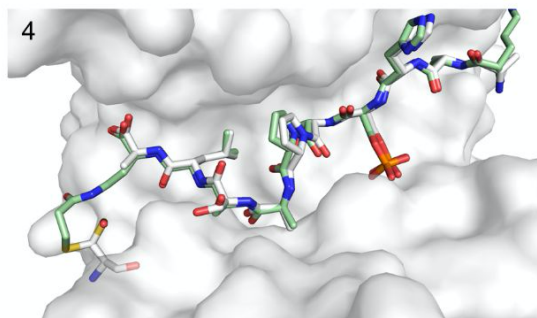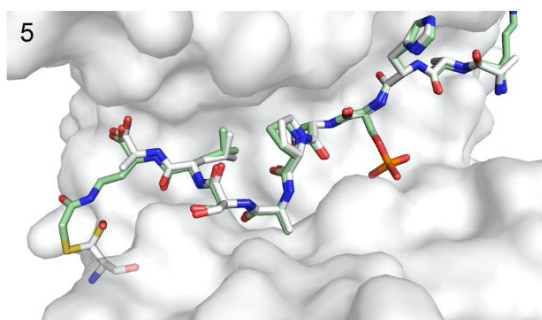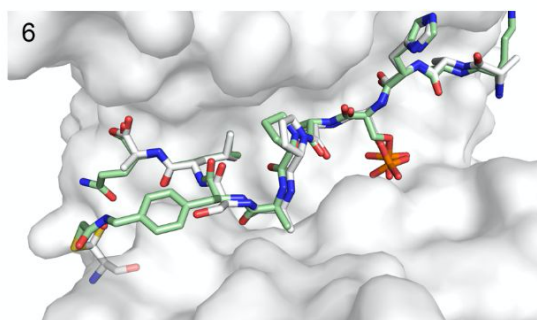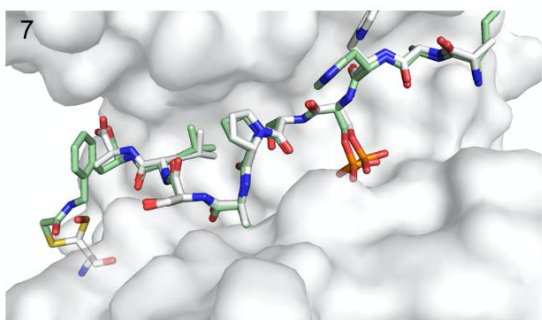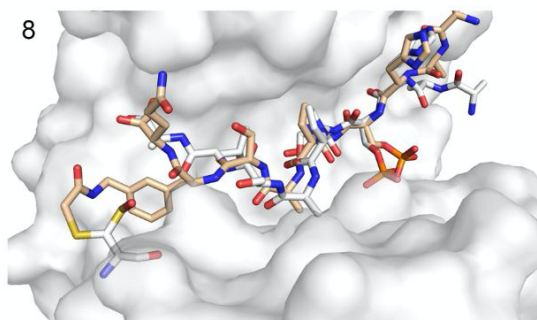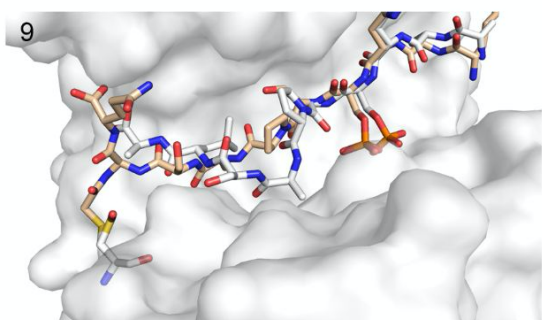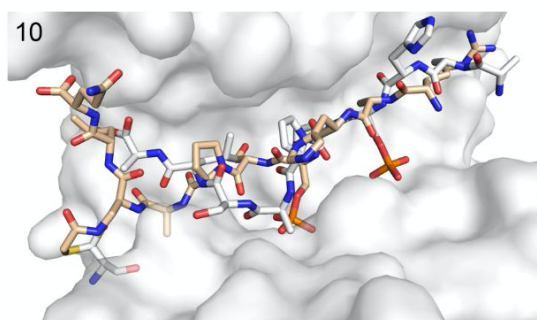

**Supplementary Figure 5: 14-3-3 $\sigma$  docking results.** Structural overlay of the docking predictions for peptides 1-10 and the crystal structure of the non-covalent YAP1 phosphopeptide (gray, PDB ID: 3MHR).

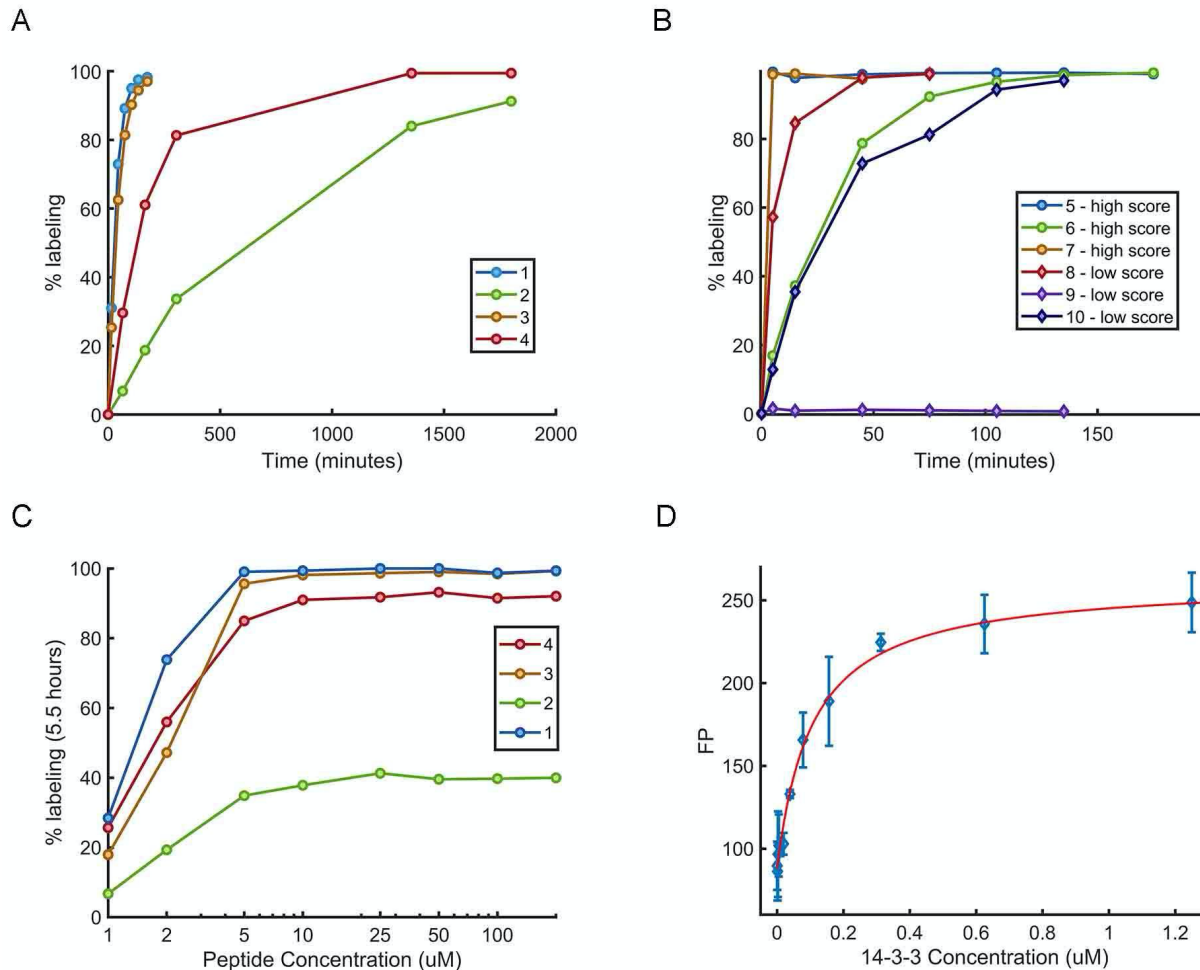

**Supplementary Figure 6: A.** Time course measurement of 14-3-3 $\sigma$  labeling (2  $\mu$ M) by acrylamide-containing electrophilic peptides (5  $\mu$ M) at room temperature. **B.** Time course measurement of 14-3-3 $\sigma$  labeling (2  $\mu$ M) by chloroacetamide-containing electrophilic peptides (5  $\mu$ M) at room temperature. **C.** Dose-response measurement of 14-3-3 $\sigma$  labeling (2  $\mu$ M) by acrylamide-containing peptides measured at 5.5 hours. **D.** Fluorescence polarization binding measurement of 10 nM BDP-TMR labeled noncovalent analog of peptide 5.

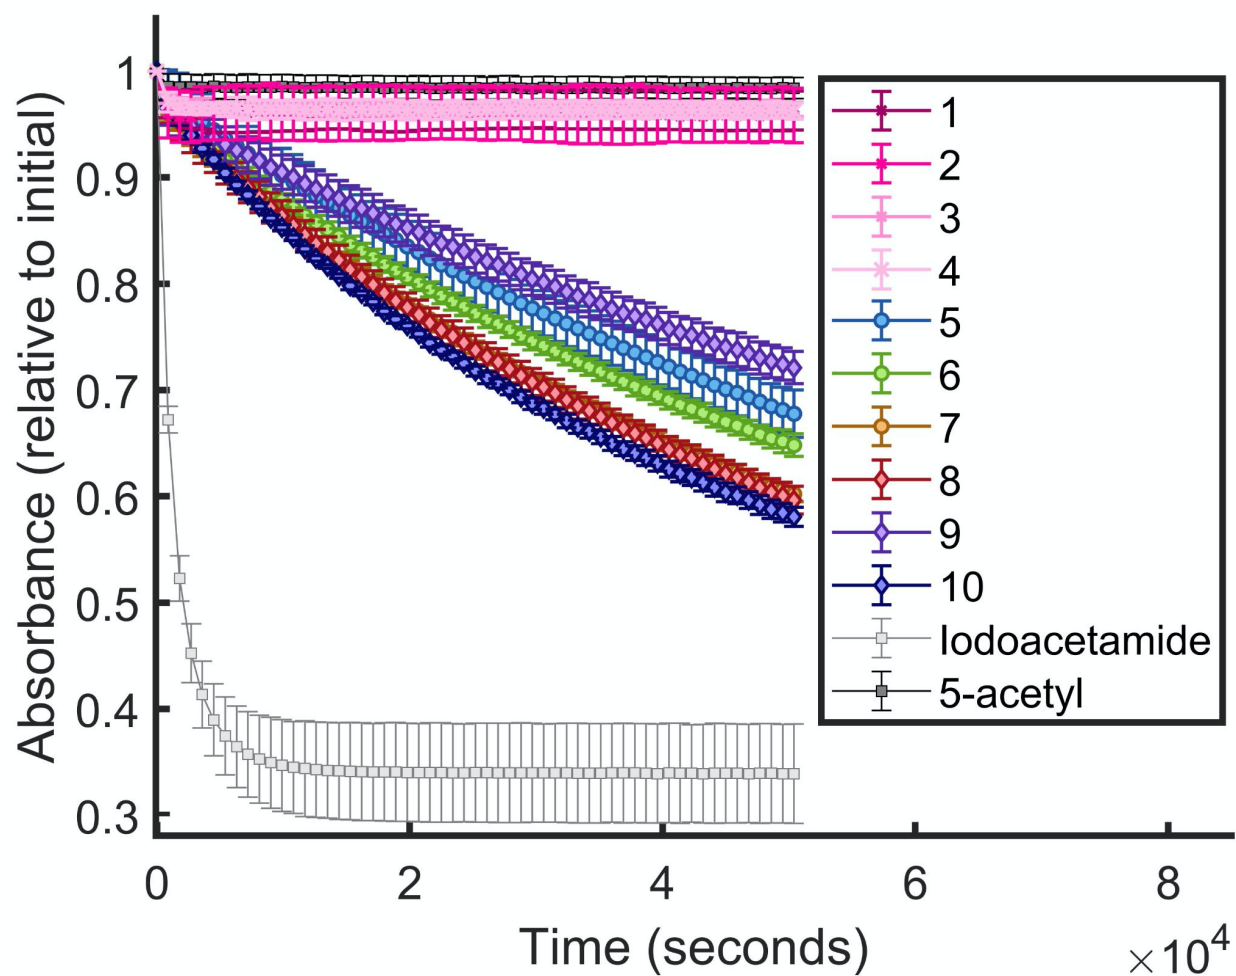

**Supplementary Figure 7:** Thiol reactivity assays of electrophilic peptides 1-10. 200  $\mu$ M peptides in NaPi 25 mM pH = 7.4, 150 mM NaCl, were reacted with 50  $\mu$ M DTNB (pre-reduced with TCEP) with monitoring the absorbance at 412 nm every 15 minutes at 37 °C. The acrylamide peptides 1-4, as well as the acetylated control, do not react. The highly reactive iodoacetamide reacts very rapidly, while the chloroacetamide peptides 5-10 display similar reaction rates to one another.

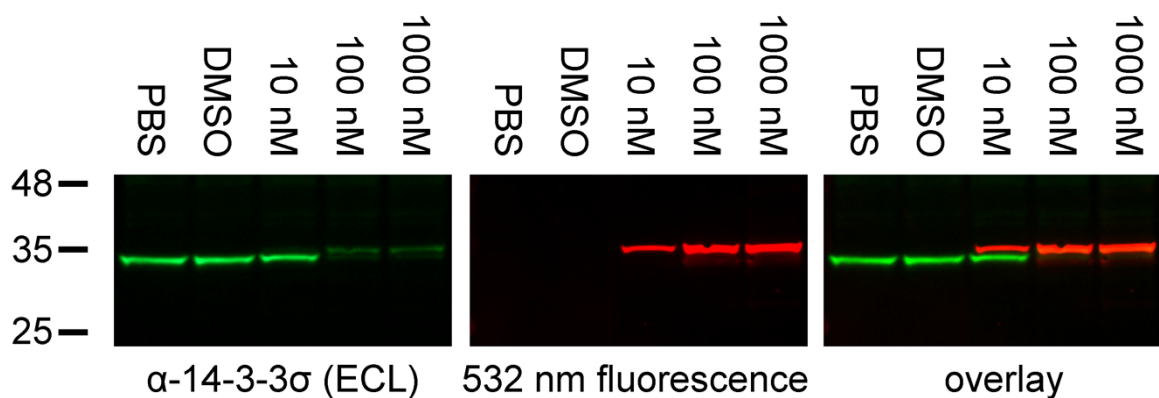

**Supplementary Figure 8:** Validation of target binding using western blot. A431 lysates were incubated with the fluorescent analog of peptide 5, separate on a 4-20% Bis Tris SDS gel and analyzed via western blot. Protein was detected both via anti-14-3-3 $\sigma$  antibody (green, visualized using an HRP-linked secondary antibody through chemiluminescence) and via measurement of fluorescence of the peptide tag (red). Disappearance of the original protein band during peptide binding occurs simultaneously with appearance of the higher mass peptide-protein conjugate, which is detected with significantly decreased intensity by the antibody.

**Table S1: Sequence alignment of the N' terminal region of 14-3-3 proteins**

|       |                                          |                               |
|-------|------------------------------------------|-------------------------------|
| Sigma | --M-ERASLIQKAKLAEQAERYEDMAAFMKGAVEKGEELS | CEERNLLSVAYKNVVGQRAAWRVLSSIE  |
| Theta | --M-EKTELIQKAKLAEQAERYDDMATCMKAVTEQGAELS | NEERNLLSVAYKNVVGRRSAWRVISSIE  |
| Delta | --M-DKNELVQKAKLAEQAERYDDMAACMKSVTEQGAELS | NEERNLLSVAYKNVVGARRSSWRVSSIE  |
| Beta  | mtM-DKSELVQKAKLAEQAERYDDMAAMKAVTEQGHELS  | NEERNLLSVAYKNVVGARRSSWRVISSIE |
| Gamma | --MvDREQLVQKARLAEQAERYDDMAAMKNVTELNEPLS  | NEERNLLSVAYKNVVGARRSSWRVISSIE |
| Eta   | --MgDREQLLQARLAEQAERYDDMASAMKAVTELNEPLS  | NEDRNLLSVAYKNVVGARRSSWRVISSIE |
| Epsil | --MdDREDLVYQAKLAEQAERYDEMVESMKKVAGMDVELT | VEERNLLSVAYKNVIGARRASWRIISSIE |

**Table S2.** Data collection and refinement statistics (molecular replacement) for 14-3-3 $\sigma$  bound to peptide 6 (PDB: 7O07)

| 14-3-3 $\sigma$ in complex with peptide 6 |                            |
|-------------------------------------------|----------------------------|
| <i>Data collection</i>                    |                            |
| Space group                               | C 2 2 21                   |
| Cell dimensions                           |                            |
| a, b, c (Å)                               | 82.6, 112.6, 63.2          |
| $\alpha$ , $\beta$ , $\gamma$ (°)         | 90, 90, 90                 |
| Resolution (Å)                            | 66.59 (1.20) (1.22 – 1.20) |
| <i>I</i> / $\sigma$ ( <i>I</i> )          | 11.8 (1.9)                 |
| Completeness (%)                          | 100.0 (100.0)              |
| Redundancy                                | 12.2 (11.4)                |
| CC <sub>1/2</sub>                         | 0.998 (0.785)              |
| <i>Refinement</i>                         |                            |
| No. reflections                           | 91999                      |
| R <sub>work</sub> /R <sub>free</sub>      | 0.184/0.1959               |
| No. atoms                                 |                            |
| Protein                                   | 2064                       |
| Ligand/ion                                | 21                         |
| Water                                     | 316                        |
| <i>B</i> -factors                         |                            |
| Protein                                   | 14.81                      |
| Ligand/ion                                | 16.70                      |
| Water                                     | 27.33                      |
| R.m.s. deviations                         |                            |
| Bond lengths (Å)                          | 0.004                      |
| Bond angles (°)                           | 0.72                       |
